# Supplementary material for: FBXW7 and USP7 regulate CCDC6 turnover during the cell cycle and affect cancer drugs susceptibility in NSCLC
Source: PubMed Central journal article supplement (PMC4494967; doi:10.18632/oncotarget.3708), 2015-03-30
Supplement: oncotarget-06-12697-s001.pdf [file oncotarget-06-12697-s001.pdf]

# FBXW7 and USP7 regulate CCDC6 turnover during the cell cycle and affect cancer drugs susceptibility in NSCLC

## Supplementary Material

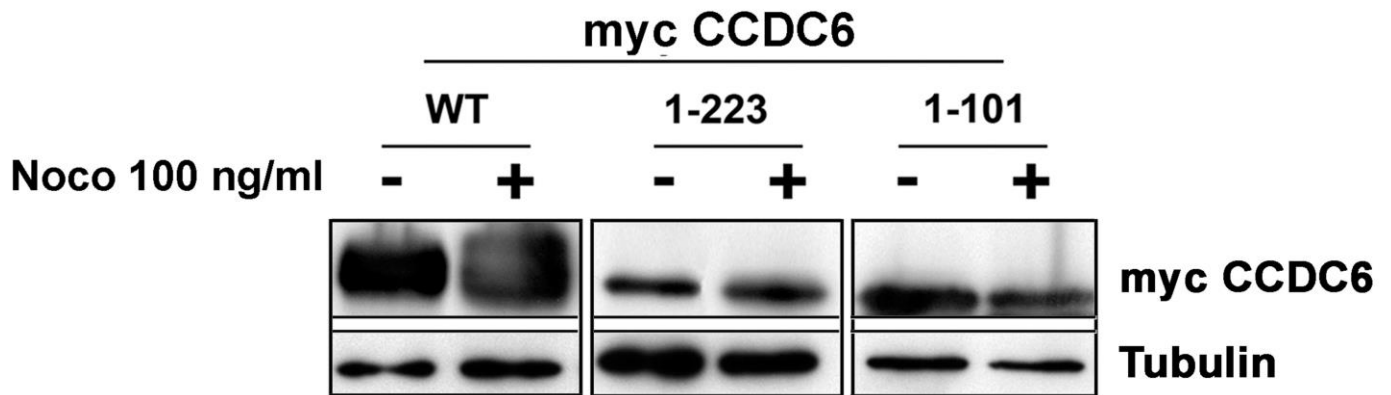

### Supplementary Figure 1: Restriction of the CCDC6 mitotic phosphorylated target region

Human HeLa cells, transiently transfected with CCDC6 wild type or the CCDC6 (1-223) and (1-101) deleted mutant constructs, were treated with 100 ng/ml nocodazole for 16 hours; samples were collected and analysed by immunoblotting using the indicated antibodies.

**A**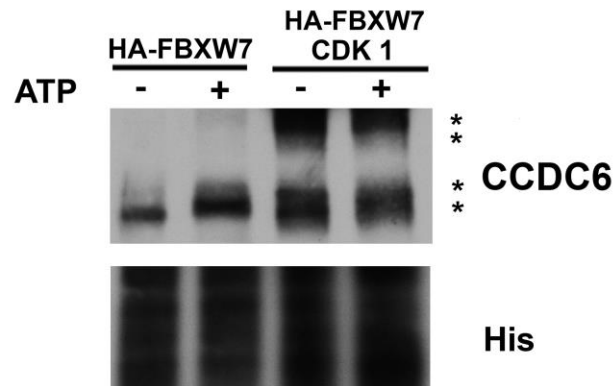**B**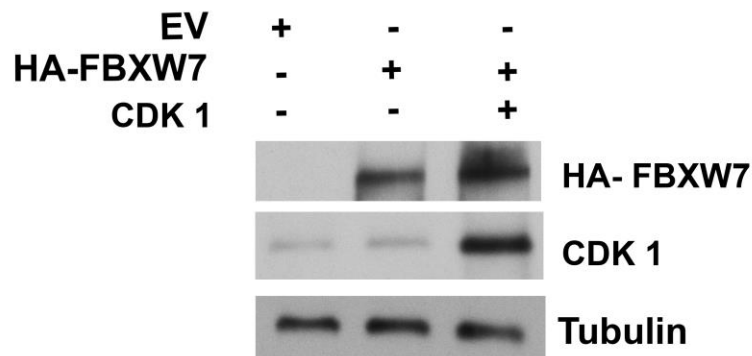

**Supplementary Figure 2: CDK1 elevated FBXW7 mediated ubiquitination of recombinant GST-CCDC6 *in vitro*** **A)** Affinity-purified GST-CCDC6 recombinant protein (Abnova H00008030-P01) was incubated with purified E1, E2, His-ubiquitin and 293T cell lysate, as source of E3 ligase FBXW7, from cells transiently transfected with HA-FBXW7, in presence or absence of CDK1 construct, at 37°C for 60 min (according to manufacturer instructions; see M&M). The ubiquitination reaction products were resolved by SDS-PAGE and probed with anti-Histidine antibody and anti-CCDC6 antibody. **B)** The transfection efficiency of the above mentioned plasmids is shown in the immunoblot hybridized with the indicated antibodies.

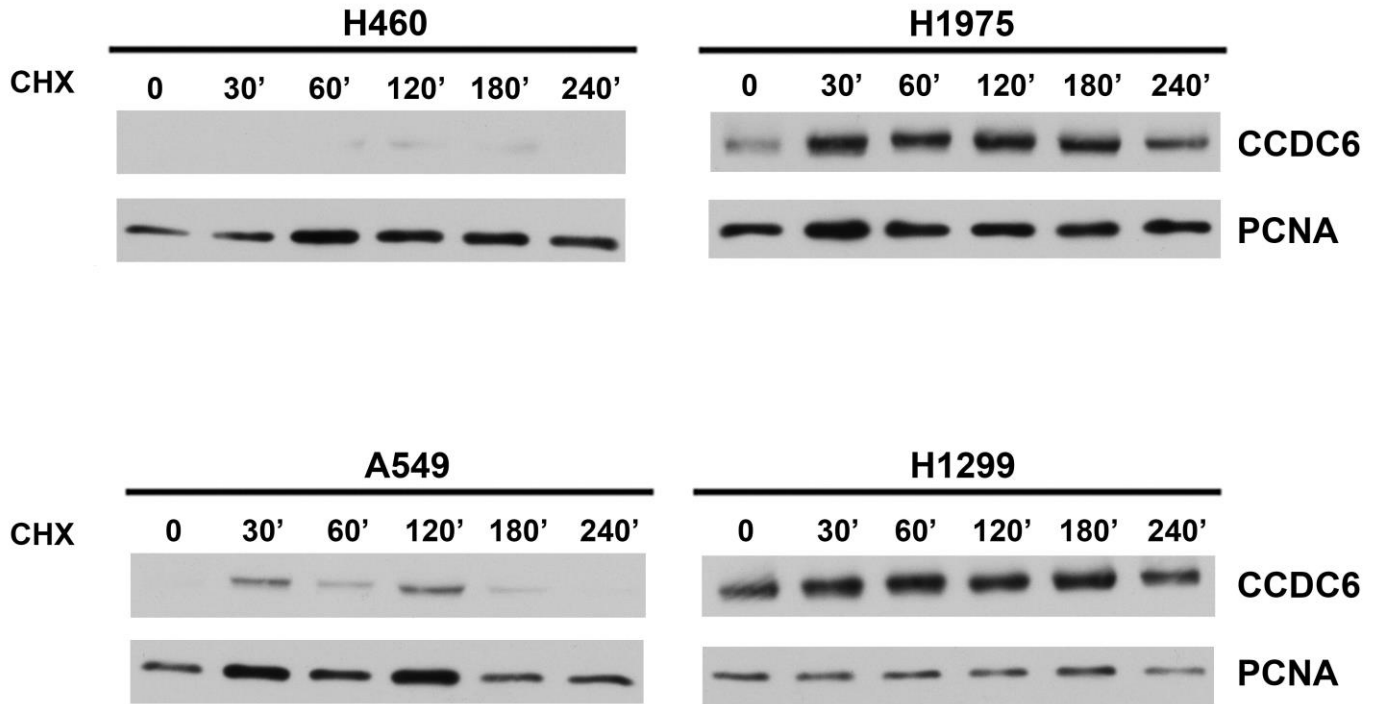

**Supplementary Figure 3: In NSCLC cell lines the CCDC6 half life differences account for the observed variations in the CCDC6 abundance.** H460, H1975, A549 and H1299 cells were treated with cycloheximide (CHX) (100 ng/ml) for the indicated times. Cell lysates were immunoblotted with the indicated antibodies.

**A**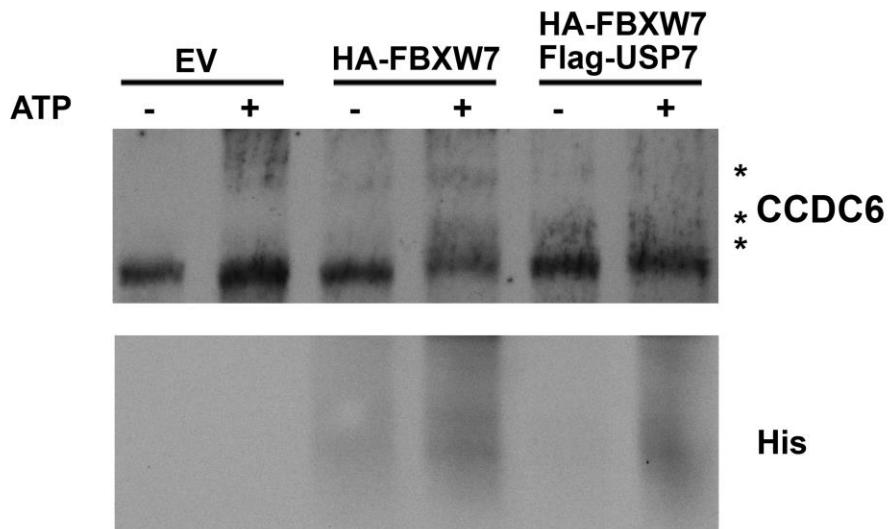**B**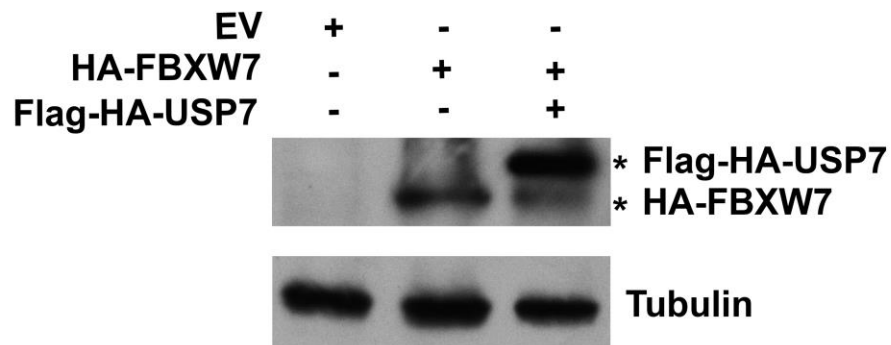

**Supplementary Figure 4: USP7 impairs the CCDC6 ubiquitination mediated by FBXW7.** **A)** Affinity-purified GST-CCDC6 recombinant protein (Abnova H00008030-P01) was incubated with purified E1, E2, His-ubiquitin and 293T cell lysate, as source of E3 ligase FBXW7, from cells transiently transfected with HA-FBXW7, in presence or absence of FLAG-HA-USP7, at 37°C for 60 min (according to manufacturer instructions; see M&M). The ubiquitination reaction products were resolved by SDS-PAGE and probed with anti-Histidine antibody and anti-CCDC6 antibody. **B)** The transfection efficiency of the above mentioned plasmids is shown in the immunoblot hybridized with the indicated antibodies.

**A**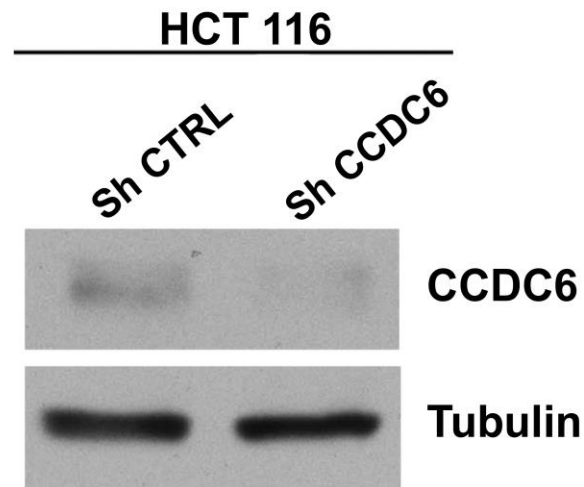**B**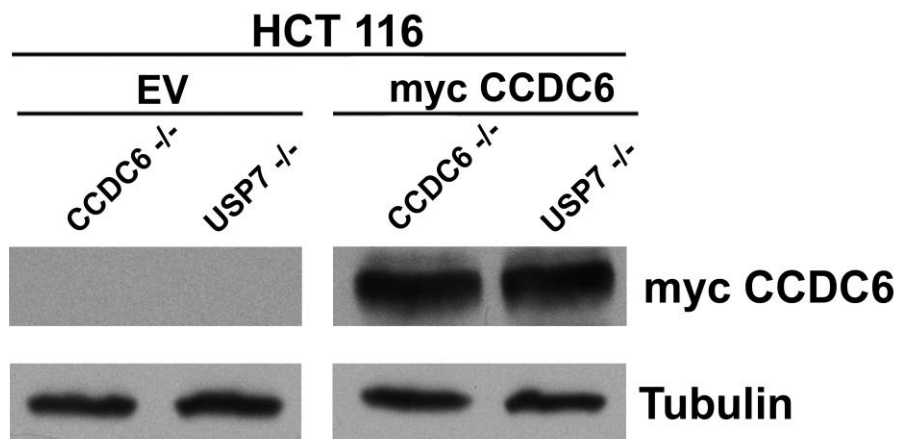

**Supplementary Figure 5:** **A)** HCT116 cells were transfected with control shRNAs (shCTRL) or sh-CCDC6. The CCDC6 protein depletion was assessed by Western blot. **B)** Myc-empty vector (EV) and myc-CCDC6 (CCDC6+) expression in HCT116 CCDC6<sup>-/-</sup> and in HCT116 USP7<sup>-/-</sup> are shown. Anti-myc hybridization is shown. Antitubulin immunoblots are shown at bottom of panels A and B, respectively.



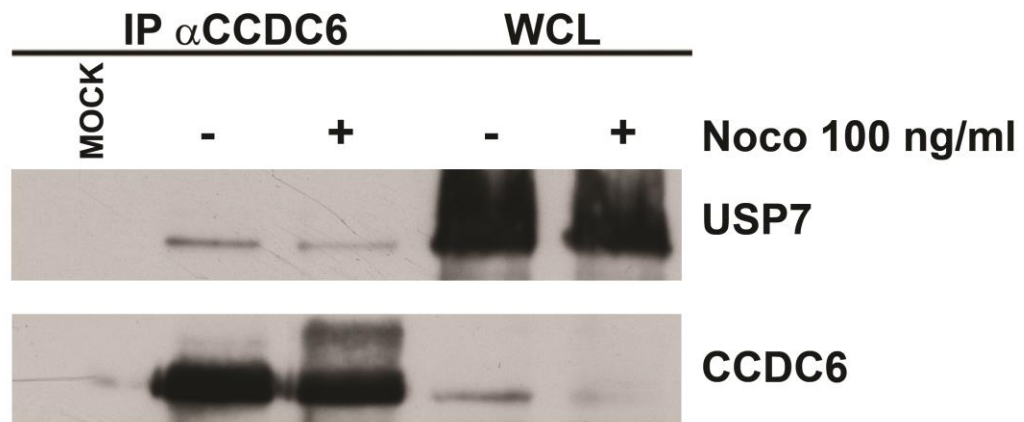

**Supplementary Figure 7: USP7-CCDC6 interaction is reduced in mitosis.**

Endogenous CCDC6 from asynchronous or mitotic HeLa cell extracts were analysed by SDS-PAGE and immunoblotted with the anti-USP7 and anti-CCDC6 antibodies, as shown. The immunoblots of the whole cell lysates (WCL) are shown at the right of the panel.

## Supplementary Table 1:

| <b>OLIGO NAME</b>          | <b>OLIGO SEQUENCE</b>             |
|----------------------------|-----------------------------------|
| CCDC6 <sub>S359A</sub> Fwd | gatcccttacacacctgctccgagttcaagcag |
| CCDC6 <sub>S359A</sub> Rev | ctgcttgaactcggagcaggtgtgtaagggatc |
| CCDC6 <sub>S413A</sub> Fwd | ggatcacaaggcctgcaccacggagaagca    |
| CCDC6 <sub>S413A</sub> Rev | tgcttctccgtgggtgcaggccttgatacc    |
| CCDC6 <sub>T427A</sub> Fwd | gatggaggcggcgcgggcccgttgaat       |
| CCDC6 <sub>T427A</sub> Rev | attcaaacggcccgcgccctccatc         |
